# Supplementary material for: Impact of a Geriatric Intervention to Improve Screening and Management of Undernutrition in Older Patients Undergoing Surgery for Colorectal Cancer: Results of the ANC Stepped-Wedge Trial
Source: MDPI journal article supplement (doi:10.3390/nu13072347), 2021-07-09
Supplement: s1 [file s1]

## Supplementary Material

**Table S1.** Cancer localization and surgery type.

| N=147                                             | Global    | Control   | Intervention | P-value        |
|---------------------------------------------------|-----------|-----------|--------------|----------------|
| Cancer Localization                               |           |           |              |                |
| Caecum                                            | 5 (3.4)   | 4 (5.5)   | 1 (1.4)      | 0.7564*        |
| Ascending colon                                   | 51 (34.7) | 27 (37)   | 24 (32.4)    |                |
| Transverse colon                                  | 1 (0.7)   | 1 (1.4)   | -            |                |
| Descending colon                                  | 17 (11.6) | 8 (11)    | 9 (12.2)     |                |
| Sigmoid colon                                     | 15 (10.2) | 9 (12.3)  | 6 (8.1)      |                |
| Colon and other <sup>1</sup>                      | 4 (2.7)   | 2 (2.7)   | 2 (2.7)      |                |
| Colon not specified                               | 14 (9.5)  | 6 (8.2)   | 8 (10.8)     |                |
| Rectum                                            | 37 (25.2) | 16 (21.9) | 21 (28.4)    |                |
| Rectum and other <sup>2</sup>                     | 1 (0.7)   |           | 1 (1.4)      |                |
| Caecum and rectum                                 | 1 (0.7)   |           | 1 (1.4)      |                |
| Not specified                                     | 1 (0.7)   |           | 1 (1.4)      |                |
| Surgery performed                                 |           |           |              |                |
| Right hemicolectomy                               | 56 (38.1) | 29 (39.7) | 27 (36.5)    | Not calculable |
| Left hemicolectomy                                | 18 (12.2) | 10 (13.7) | 8 (10.8)     |                |
| Sigmoid colon resection                           | 12 (8.2)  | 8 (11)    | 4 (5.4)      |                |
| Segmental colectomy                               | 2 (1.4)   | -         | 2 (2.7)      |                |
| Total or subtotal colectomy                       | 8 (5.4)   | 6 (8.2)   | 2 (2.7)      |                |
| Anterior rectum resection                         | 11 (7.5)  | 4 (5.5)   | 7 (9.5)      |                |
| Abdomino-perineal rectum resection                | 1 (0.7)   | 1 (1.4)   | -            |                |
| Abdomino-perineal amputation                      | 5 (3.4)   | 2 (2.7)   | 3 (4.1)      |                |
| Total proctectomy                                 | 12 (8.2)  | 5 (6.8)   | 7 (9.5)      |                |
| Rectum resection, not specified                   | 5 (3.4)   | 2 (2.7)   | 3 (4.1)      |                |
| Complex surgery <sup>1,2</sup>                    | 6 (4.1)   | 5 (6.8)   | 7 (9.5)      |                |
| Not specified                                     | 11 (7.5)  | 1 (1.4)   | 10 (13.5)    |                |
| Surgery Method                                    |           |           |              |                |
| Open surgery                                      | 22 (15)   | 13 (17.8) | 9 (12.2)     | 0.2092         |
| Mini-invasive (laparoscopy and/or robot assisted) | 48 (32.7) | 19 (26)   | 29 (39.2)    |                |
| Not specified                                     | 77 (52.4) | 41 (56.2) | 36 (48.6)    |                |

<sup>1</sup> these were: (colon+ liver), (colon + stomach), (colon + stomach + gall bladder), (colon + prostate + gall bladder); <sup>2</sup> these were: (rectum+ small intestine + bladder resection). P-value : Categorical variables Chi-squared test or Fisher's exact test (\*) - Continuous variables Student t-test or the Wilcoxon test (\*).

**Table S2** – Detail of observed discrepancies between reported and calculated nutritional status for incorrectly assessed patients (n=98)<sup>a</sup>.

| <b>Reported<br/>Nutritional Status</b> | <b>Calculated<br/>Nutritional Status</b> | <b>Frequency</b> | <b>Percentage</b> |
|----------------------------------------|------------------------------------------|------------------|-------------------|
| No under-nutrition                     | Moderate                                 | 16               | 16.3              |
|                                        | Severe                                   | 2                | 2.0               |
|                                        | NC                                       | 24               | 24.5              |
| Moderate                               | No under-nutrition                       | 3                | 3.1               |
|                                        | Severe                                   | 13               | 13.3              |
|                                        | NC                                       | 6                | 6.1               |
| Severe                                 | No under-nutrition                       | 1                | 1.0               |
|                                        | Moderate                                 | 4                | 4.1               |
|                                        | NC                                       | 1                | 1.0               |
| Other                                  | NC                                       | 1                | 1.0               |
| Not Reported                           | No under-nutrition                       | 4                | 4.1               |
|                                        | Moderate                                 | 7                | 7.1               |
|                                        | NC                                       | 16               | 16.3              |

Note. NC= not calculable; a. For 98 patients out of 147 (66.7%), nutritional status was estimated inadequately.

**Table S3 A & B** – Rate of 30-day surgical complications according to adequate/inadequate nutritional management (A) and according to compliance/non-compliance with guidelines of overall management (evaluation and management) (B), N=145.

| <b>A</b>                                              | <b>Global</b> | <b>Adequate prescription<br/>n(%)</b> | <b>Inadequate<br/>prescription<br/>n(%)</b> | <b>P-Value</b> |
|-------------------------------------------------------|---------------|---------------------------------------|---------------------------------------------|----------------|
| Patients with at least one post-surgical complication | 38 (26.2)     | 10 (30.3)                             | 28 (25)                                     | 0.5426         |

  

| <b>B</b>                                              | <b>Global</b> | <b>Conformity of<br/>management with<br/>guidelines<br/>n(%)</b> | <b>Non-conformity<br/>n(%)</b> | <b>P-Value</b> |
|-------------------------------------------------------|---------------|------------------------------------------------------------------|--------------------------------|----------------|
| Patients with at least one post-surgical complication | 38 (26.2)     | 9 (31)                                                           | 29 (25)                        | 0.5086         |

**Table S4** – Adverse Events (AE) reported during the study

|                                          |          | Control<br>n(%) | Intervention<br>n(%) | P-Value |
|------------------------------------------|----------|-----------------|----------------------|---------|
| <b>Patients with at least one AE (%)</b> |          | 31 (41.9)       | 44 (57.9)            | 0.0500  |
| Severity of AE                           | Low      | 16 (32)         | 78 (54.2)            | 0.0109  |
|                                          | Moderate | 28 (56)         | 47 (32.6)            |         |
|                                          | Severe   | 6 (12)          | 19 (13.2)            |         |
